# Supplementary material
Source: publisher figshare collection journal article supplement (https://acs.figshare.com/ndownloader/files/4260361)

**Figure S1** GC-TOFMS total ion current (TICs) chromatograms of six CSL samples from different manufactures. IS, succinic acid d<sub>4</sub>, internal standard.

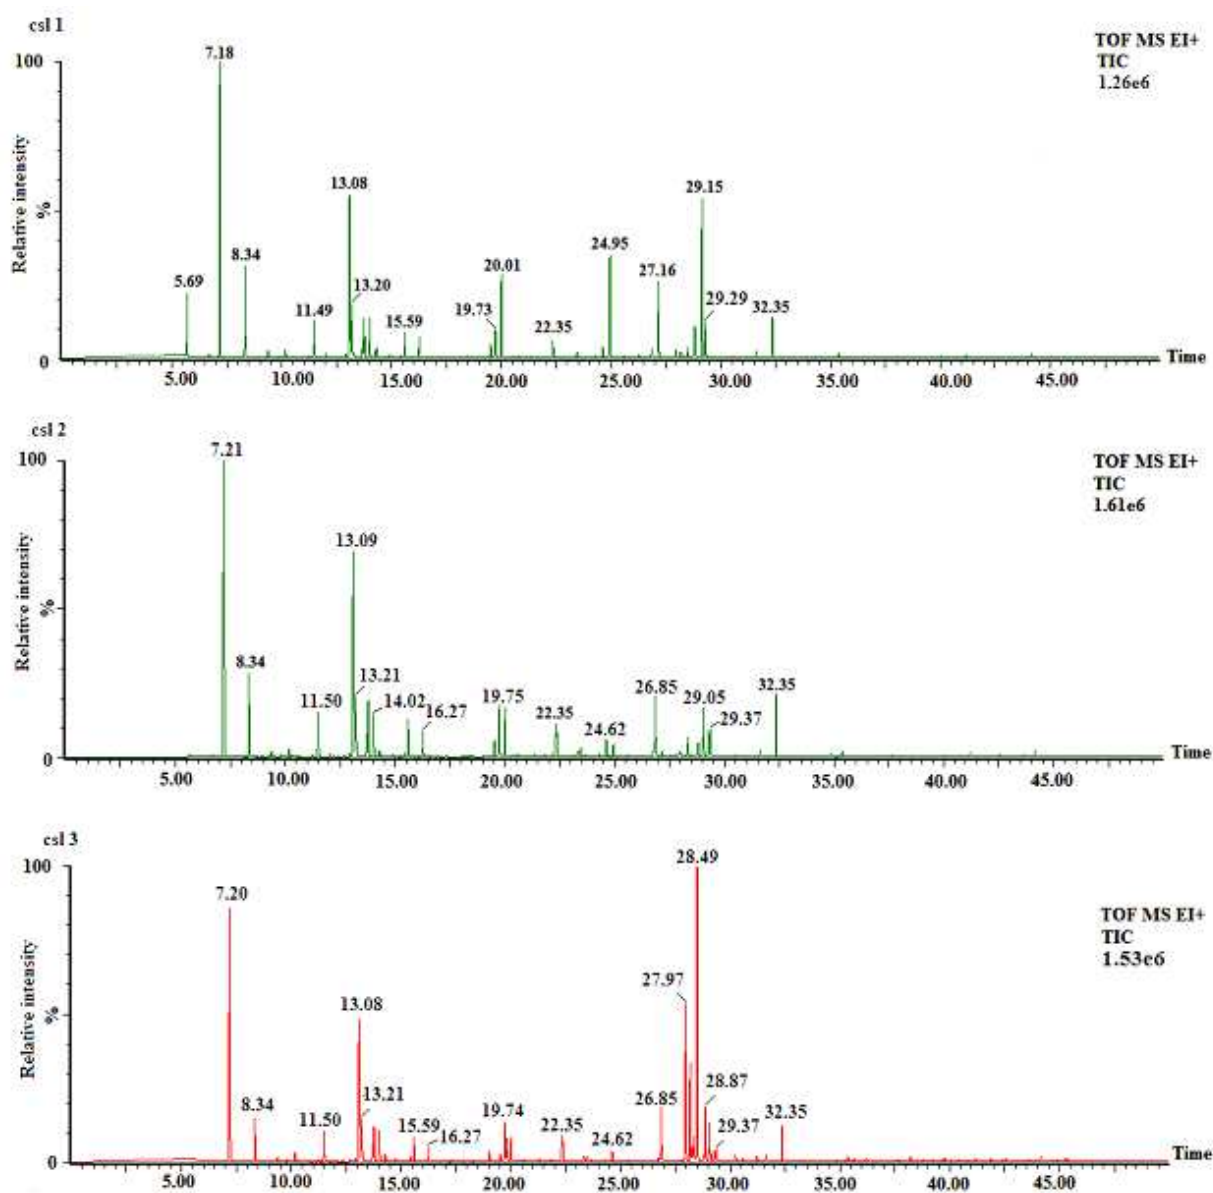

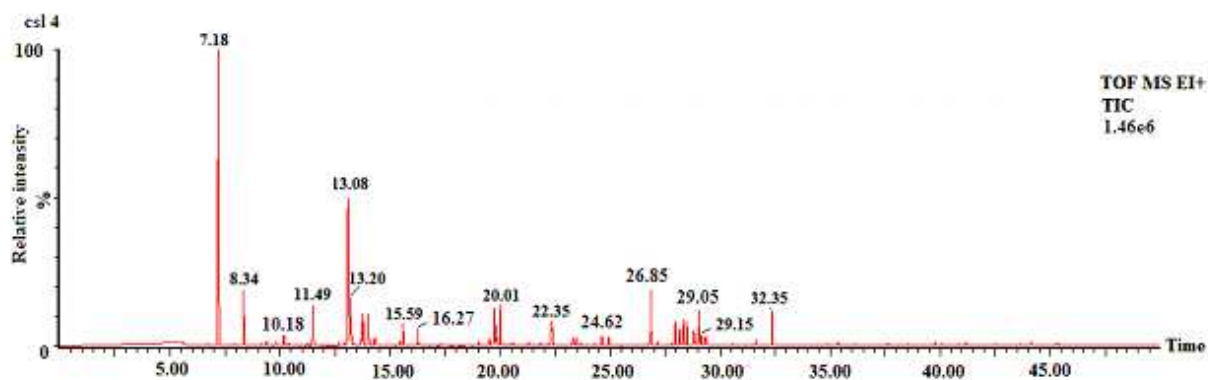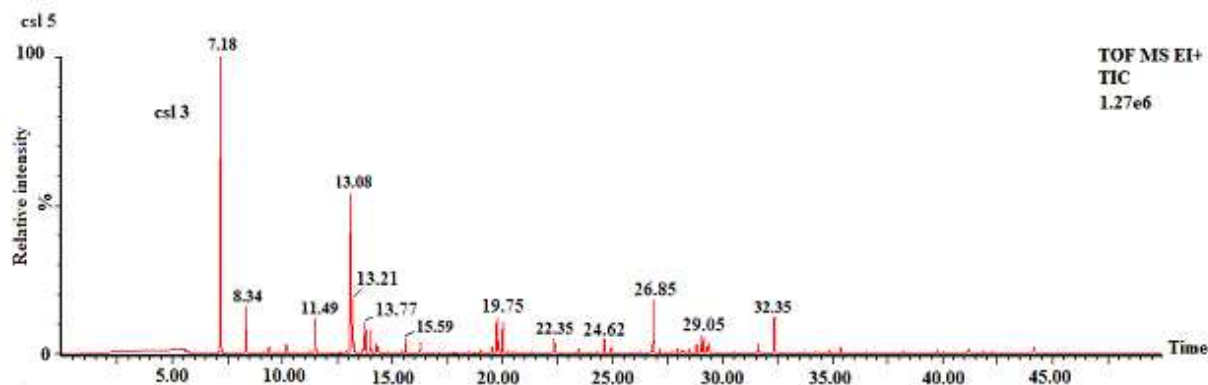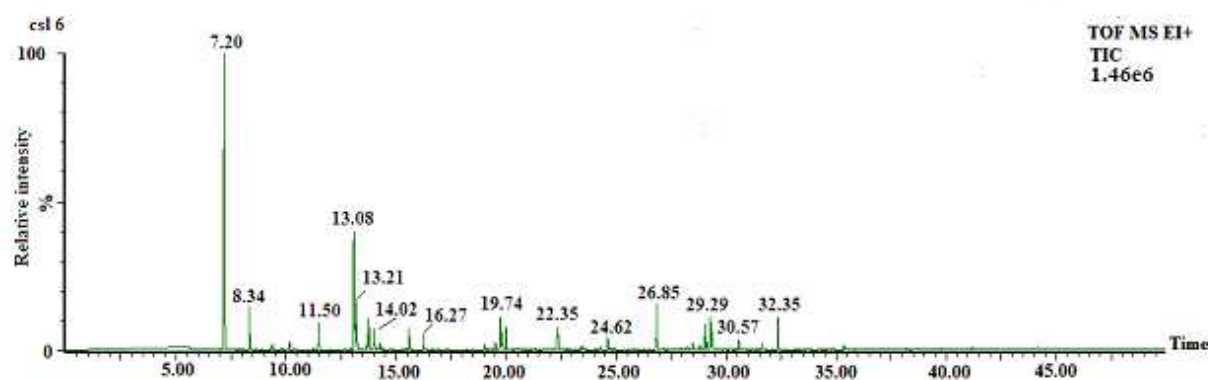

Supplement: Supplementary file 1 [file 4260361]
